# Supplementary material for: Antifungal metabolites from Myxococcus stipitatus GXUA 01510 for the control of sugarcane Pokkah boeng disease caused by Fusarium sacchari
Source: Royal Society of Chemistry journal article supplement (doi:10.1039/d5ra10061e), 2026-05-06
Supplement: d5ra10061e1.pdf [file d5ra10061e1.pdf]

## Supporting Information

### **Antifungal metabolites from *Myxococcus stipitatus* GXUA 01510 for the control of sugarcane Pokkah boeng disease caused by *Fusarium sacchari***

Wang Jiang,<sup>a</sup> Qun Hao Li,<sup>a</sup> Jiasong Guan,<sup>a</sup> Ahmed F. Elkarmout,<sup>a,b</sup> Zhonghui Ma<sup>\*a</sup> and Zhiwei Su<sup>\*a</sup>

<sup>a</sup> National Demonstration Center for Experimental Plant Science Education, College of Agriculture, Guangxi University, Nanning 530004, Guangxi, China.

<sup>b</sup> Department of Horticulture, Faculty of Agriculture, Tanta University, Tanta, Egypt.

\* Correspondence.

Zhonghui Ma. E-mail: mazhonghui@gxu.edu.cn

Zhiwei Su. E-mail: suzhiwei@gxu.edu.cn

## Table of Contents

**Table S1.**  $^1\text{H}$  NMR and  $^{13}\text{C}$  NMR data of compounds **1** (in  $\text{CDCl}_3$ ) **3** and phenalamide  $\text{A}_2^1$  (in  $\text{CD}_3\text{OD}$ )

**Figure S1** Predicted biosynthetic structure of phenalamide

**Figure S2** HRESI-MS spectrum of phenalamide D (**1**)

**Figure S3**  $^1\text{H}$  NMR spectrum of phenalamide D (**1**) in  $\text{CDCl}_3$  (500 MHz)

**Figure S4**  $^{13}\text{C}$  NMR spectrum of phenalamide D (**1**) in  $\text{CDCl}_3$  (125 MHz)

**Figure S5** HSQC spectrum of phenalamide D (**1**) in  $\text{CDCl}_3$

**Figure S6** HMBC spectrum of phenalamide D (**1**) in  $\text{CDCl}_3$

**Figure S7**  $^1\text{H}$ - $^1\text{H}$  COSY spectrum of phenalamide D (**1**) in  $\text{CDCl}_3$

**Figure S8** NOESY spectrum of phenalamide D (**1**) in  $\text{CDCl}_3$

**Figure S9** IR spectrum of phenalamide D (**1**)

**Figure S10** HRESI-MS spectrum of phenalamide E (**2**)

**Figure S11**  $^1\text{H}$  NMR spectrum of phenalamide E (**2**) in  $\text{CDCl}_3$  (500 MHz)

**Figure S12**  $^{13}\text{C}$  NMR spectrum of phenalamide E (**2**) in  $\text{CDCl}_3$  (125 MHz)

**Figure S13** HSQC spectrum of phenalamide E (**2**) in  $\text{CDCl}_3$

**Figure S14** HMBC spectrum of phenalamide E (**2**) in  $\text{CDCl}_3$

**Figure S15** IR spectrum of phenalamide E (**2**)

**Figure S16** HRESI-MS spectrum of phenalamide F (**3**)

**Figure S17**  $^1\text{H}$  NMR spectrum of phenalamide F (**3**) in  $\text{CD}_3\text{OD}$  (600 MHz)

**Figure S18**  $^{13}\text{C}$  NMR spectrum of phenalamide F (**3**) in  $\text{CD}_3\text{OD}$  (150 MHz)

**Figure S19** HSQC spectrum of phenalamide F (**3**) in  $\text{CD}_3\text{OD}$

**Figure S20** HMBC spectrum of phenalamide F (**3**) in  $\text{CD}_3\text{OD}$

**Figure S21**  $^1\text{H}$ - $^1\text{H}$  COSY spectrum of phenalamide F (**3**) in  $\text{CD}_3\text{OD}$

**Figure S22** NOESY spectrum of phenalamide F (**3**) in  $\text{CD}_3\text{OD}$

**Figure S23** IR spectrum of phenalamide F (**3**)

**Figure S24** HRESI-MS spectrum of phenalamide G (**4**)

**Figure S25**  $^1\text{H}$  NMR spectrum of phenalamide G (**4**) in  $\text{CD}_3\text{OD}$  (600 MHz)

**Figure S26**  $^{13}\text{C}$  NMR spectrum of phenalamide G (**4**) in  $\text{CD}_3\text{OD}$  (150 MHz)

**Figure S27** HSQC spectrum of phenalamide G (**4**) in  $\text{CD}_3\text{OD}$

**Figure S28** HMBC spectrum of phenalamide G (**4**) in  $\text{CD}_3\text{OD}$

**Figure S29**  $^1\text{H}$ - $^1\text{H}$  COSY spectrum of phenalamide G (**4**) in  $\text{CD}_3\text{OD}$

**Figure S30** NOESY spectrum of phenalamide G (**4**) in  $\text{CD}_3\text{OD}$

**Figure S31** IR spectrum of phenalamide G (**4**)

**Figure S32.** HPLC purity chromatograms of the isolated new compounds and potent active.

**Table S1.** <sup>1</sup>H NMR and <sup>13</sup>C NMR data of compounds **1** (in CDCl<sub>3</sub>), **3** and phenalamide A<sub>2</sub><sup>1</sup> (in CD<sub>3</sub>OD).

| Position | <b>1</b>   |                      | <b>3</b> |            |                      | phenalamide A <sub>2</sub> |            |                             |
|----------|------------|----------------------|----------|------------|----------------------|----------------------------|------------|-----------------------------|
|          | $\delta_C$ | $\delta_H$ (J in Hz) | Position | $\delta_C$ | $\delta_H$ (J in Hz) | Position                   | $\delta_C$ | $\delta_H$ (J in Hz)        |
| *        | —          | —                    | 1        | 171.8      | —                    | 1                          | 171.8      | —                           |
| *        | —          | —                    | 2        | 131.3      | —                    | 2                          | 130.6      | —                           |
| *        | —          | —                    | 3        | 135.0      | 6.93, d (9.4)        | 3                          | 135.2      | 6.96, d (9.1)               |
| *        | —          | —                    | 4        | 139.4      | 6.56-6.59, m         | 4                          | 128.4      | 6.58, m                     |
| *        | —          | —                    | 5        | 128.9      | 6.60, d (14.7)       | 5                          | 139.9      | 6.58, m                     |
| *        | —          | —                    | 6        | 129.0      | 6.39, d (14.7)       | 6                          | 127.6      | 6.40, m                     |
| *        | —          | —                    | 7        | 133.3      | 6.41-6.45, m         | 7                          | 127.7      | 6.29, m                     |
| *        | —          | —                    | 8        | 136.5      | 6.41-6.45, m         | 8                          | 137.8      | 6.40, m                     |
| 1        | 195.4      | 9.43, s              | 9        | 142.1      | 5.97, d (14.7)       | 9                          | 141.0      | 6.40, m                     |
| 2        | 139.7      | —                    | 10       | 83.7       | —                    | 10                         | 135.4      | —                           |
| 3        | 157.1      | 6.46, dd (9.6, 1.4)  | 11       | 85.1       | 3.66, d (9.4)        | 11                         | 138.9      | 5.61, d (9.5)               |
| 4        | 37.2       | 2.85-2.94, m         | 12       | 43.7       | 2.00-2.04, m         | 12                         | 37.8       | 2.82, qdd (6.8, 9.7, 6.6)   |
| 5        | 81.9       | 3.86, d (8.0)        | 13       | 89.4       | 3.86, d (9.8)        | 13                         | 82.6       | 3.84, d (6.6)               |
| 6        | 133.9      | —                    | 14       | 133.6      | —                    | 14                         | 136.3      | —                           |
| 7        | 135.4      | 5.24, d (9.6)        | 15       | 137.0      | 5.31, d (9.3)        | 15                         | 134.1      | 5.27, d (9.4)               |
| 8        | 31.7       | 2.38-2.47, m         | 16       | 33.0       | 2.43-2.50, m         | 16                         | 32.8       | 2.45, m                     |
| 9        | 38.9       | 1.53-1.70, m         | 17a      | 40.5       | 1.54-1.60, m         | 17a                        | 40.8       | 1.55, m                     |
|          |            |                      | 17b      |            | 1.65-1.72, m         | 17b                        |            | 1.67, m                     |
| 10       | 33.9       | 2.52-2.62, m         | 18a      |            | 2.64-2.69, m         | 18a                        | 34.9       | 2.64, m                     |
|          |            |                      | 18b      | 34.8       | 2.54-2.61, m         | 18b                        |            | 2.53, m                     |
| 11       | 142.5      | —                    | 19       | 143.9      | —                    | 19                         | 144.0      | —                           |
| 12       | 128.4      | 7.12-7.19, m         | 20       | 129.4      | 7.19, d (7.2)        | 20                         | 129.4      | 7.16, d (6.8)               |
| 13       | 128.3      | 7.23-7.29, m         | 21       | 129.3      | 7.23-7.28, m         | 21                         | 129.2      | 7.24, t (7.5)               |
| 14       | 125.7      | 7.12-7.19, m         | 22       | 126.6      | 7.15, t (7.2)        | 22                         | 126.5      | 7.14, t (7.1)               |
| 15       | 128.3      | 7.23-7.29, m         | 23       | 129.3      | 7.23-7.28, m         | 23                         | 129.2      | 7.24, t (7.5)               |
| 16       | 128.4      | 7.12-7.19, m         | 24       | 129.4      | 7.19, d (7.2)        | 24                         | 129.4      | 7.16, d (6.8)               |
| 2-Me     | 9.6        | 1.79, d (1.4)        | 2-Me     | 13.1       | 1.99, s              | 2-Me                       | 13.1       | 2.01, d (1.0)               |
| 4-Me     | 16.6       | 0.95, d (6.8)        | 10-Me    | 22.3       | 1.29, s              | 10-Me                      | 12.9       | 1.84, s                     |
| 6-Me     | 11.5       | 1.60, d (1.4)        | 12-Me    | 13.9       | 0.99, d (6.5)        | 12-Me                      | 18.3       | 0.97, d (6.8)               |
| 8-Me     | 21.0       | 0.98, d (6.8)        | 14-Me    | 11.3       | 1.63, s              | 14-Me                      | 12.6       | 1.61, d (1.0)               |
| *        | —          | —                    | 16-Me    | 21.4       | 0.98, d (6.5)        | 16-Me                      | 21.5       | 1.00, d (6.6)               |
| *        | —          | —                    | 1'-Me    | 17.1       | 1.19, d (6.8)        | 1'-Me                      | 17.1       | 1.22, d (6.7)               |
| *        | —          | —                    | 1'       | 49.8       | 4.04-4.09, m         | 1'                         |            | 4.1, qdd (6.7, 5.5, 11.0)   |
| *        | —          | —                    | 2'       | 66.1       | 3.50-3.58, m         | 2'                         | 66.1       | 3.56, ddd (5.5, 11.0, 16.5) |

1. W. Trowitzsch-Kienast, E. Forche, V. Wray, H. Reichenbach, E. Jurkiewicz, G. Hunsmann and G. Höfle, *Liebigs Ann. Chem.*, 2006, **1992**, 659-664.

\*' represents that the space left out corresponds to other similar signals of another compound.

<sup>1</sup>H NMR (500 MHz) and <sup>13</sup>C NMR (125 MHz) for compound 1; <sup>1</sup>H NMR (600 MHz) and <sup>13</sup>C NMR (150 MHz) for compound 3 and phenalamide A<sub>2</sub>.

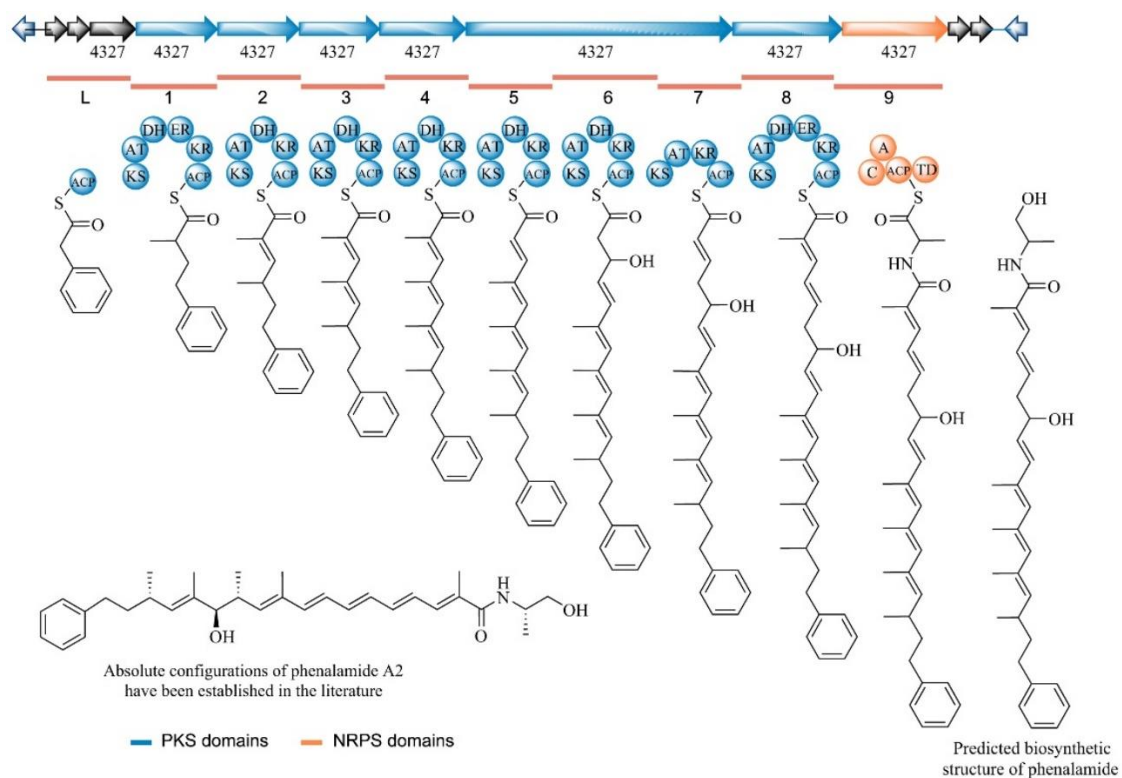

**Figure S1** Predicted biosynthetic structure of phenalamide <sup>2</sup>.

2. S. Park, H. Hyun, J. S. Lee and K. Cho, *J. Microbiol. Biotechnol.*, 2016, **26**, 1636-1642.

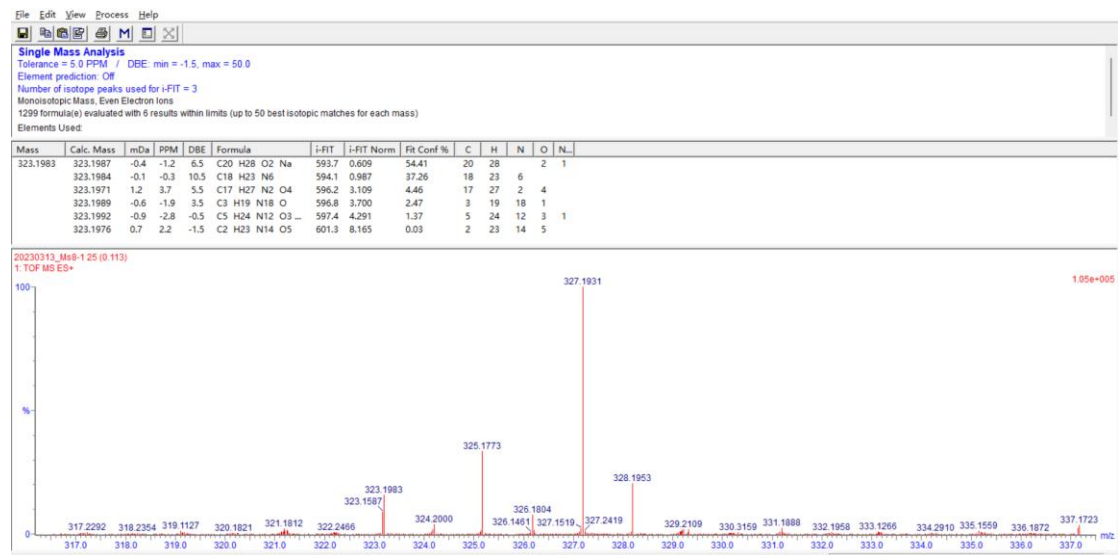

**Figure S2** HRESI-MS spectrum of phenalamide D (1).

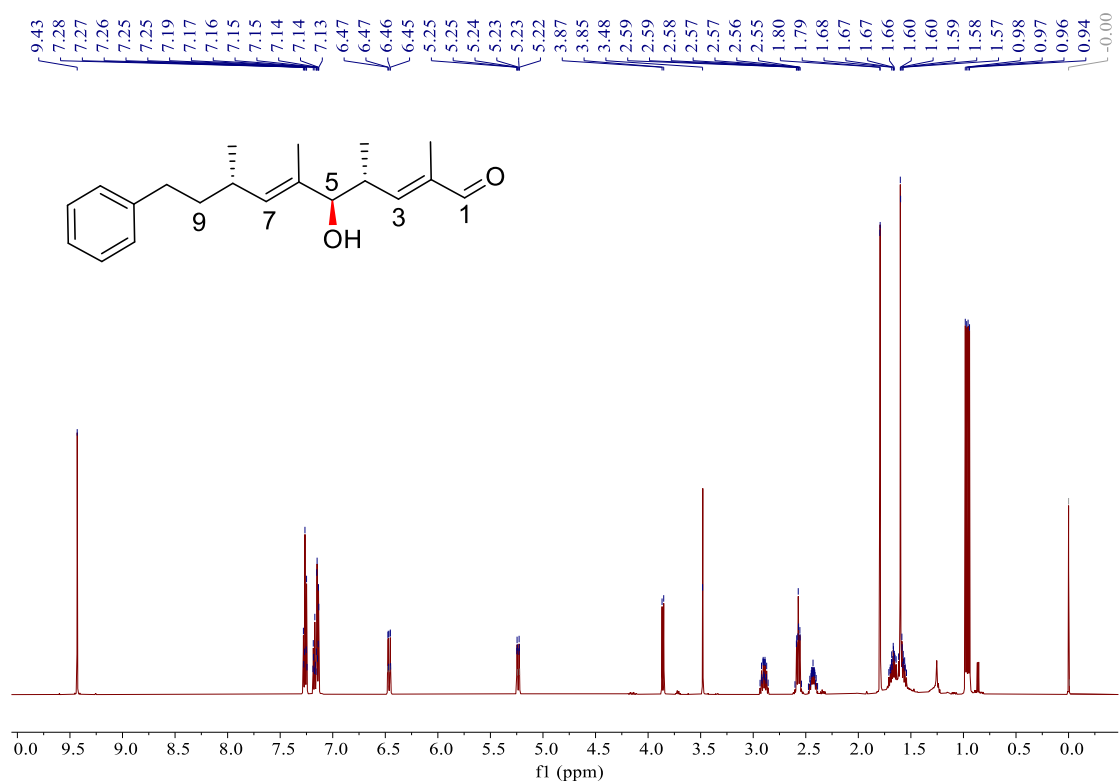

Figure S3  $^1\text{H}$  NMR spectrum of phenalamide D (1) in  $\text{CDCl}_3$  (500 MHz).

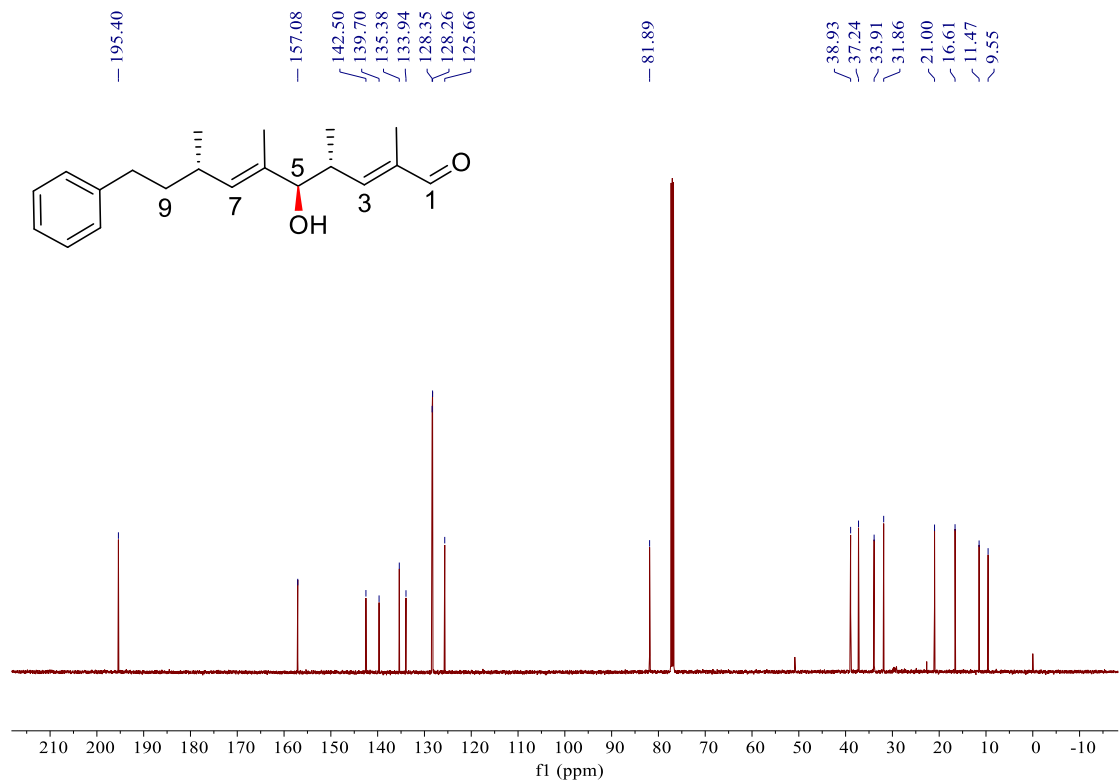

Figure S4  $^{13}\text{C}$  NMR spectrum of phenalamide D (1) in  $\text{CDCl}_3$  (125 MHz).

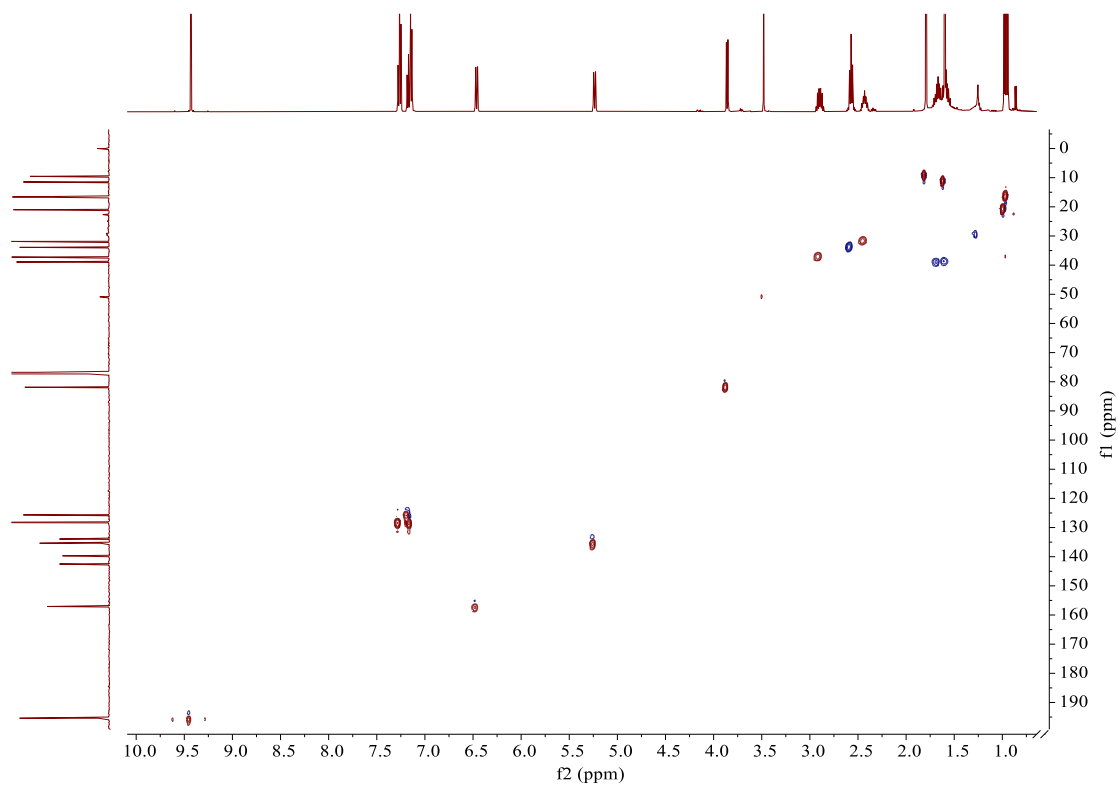

**Figure S5** HSQC spectrum of phenalamide D (**1**) in  $\text{CDCl}_3$ .

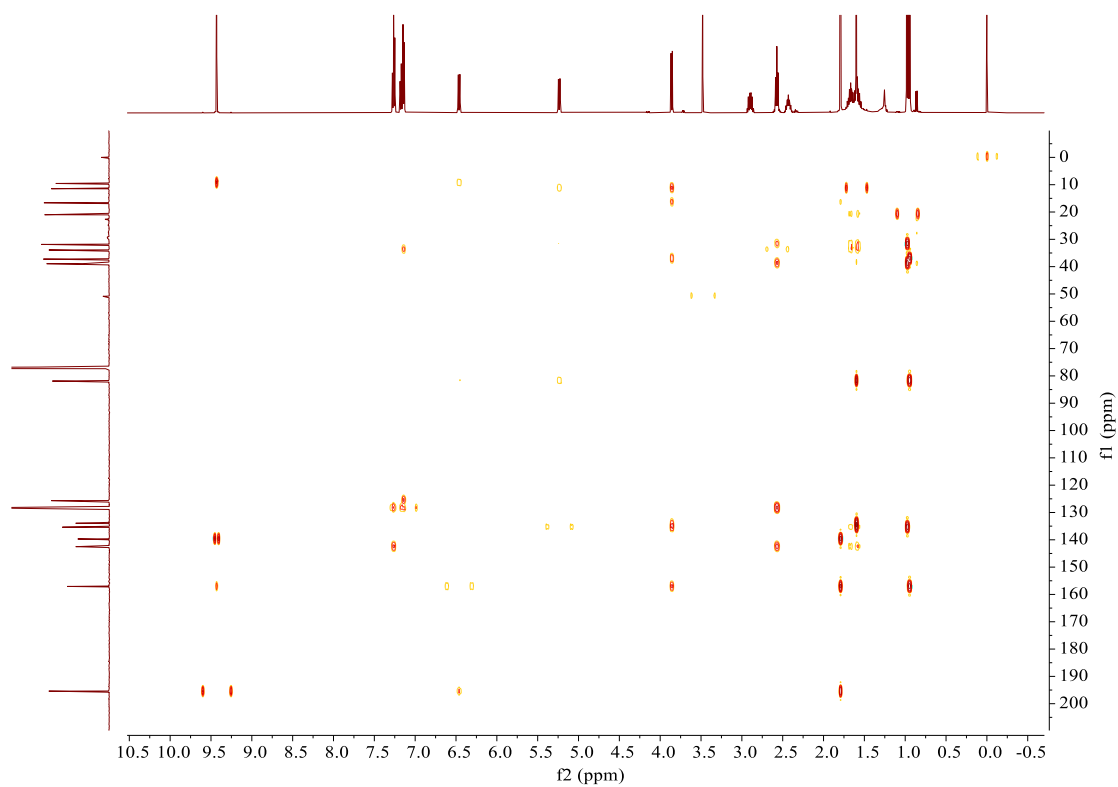

**Figure S6** HMBC spectrum of phenalamide D (**1**) in  $\text{CDCl}_3$ .

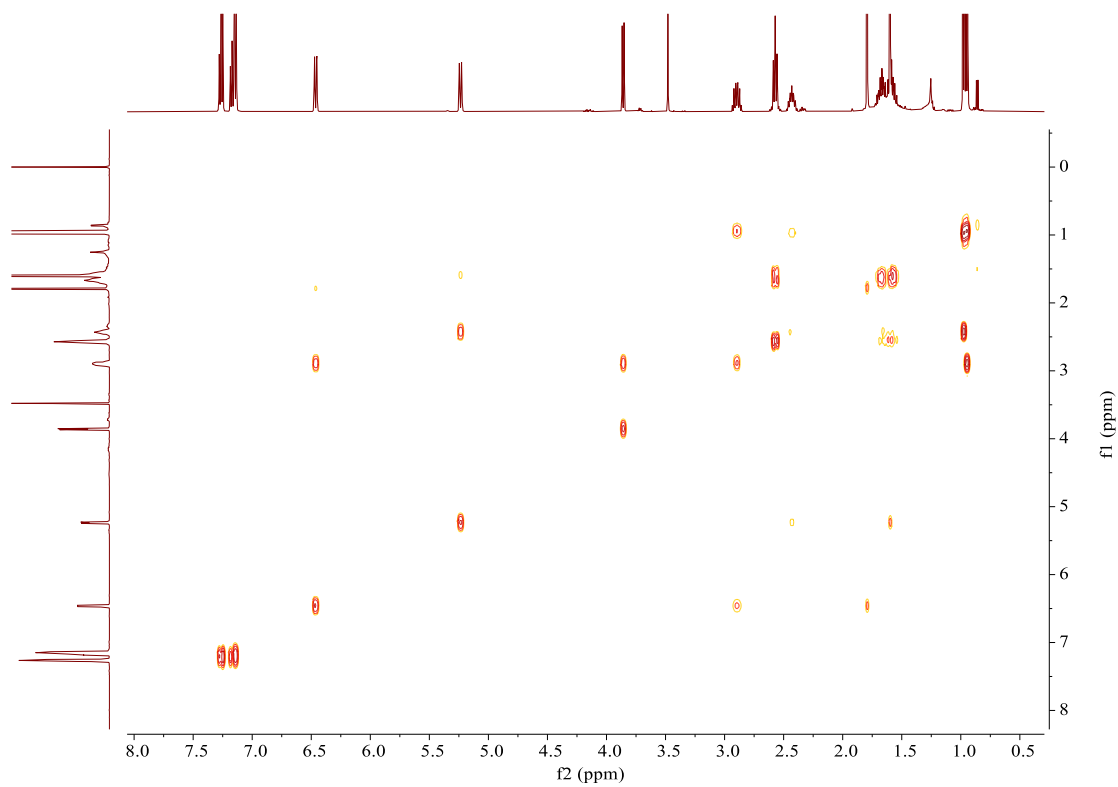

**Figure S7**  $^1\text{H}$ - $^1\text{H}$  COSY spectrum of phenalamide D (**1**) in  $\text{CDCl}_3$ .

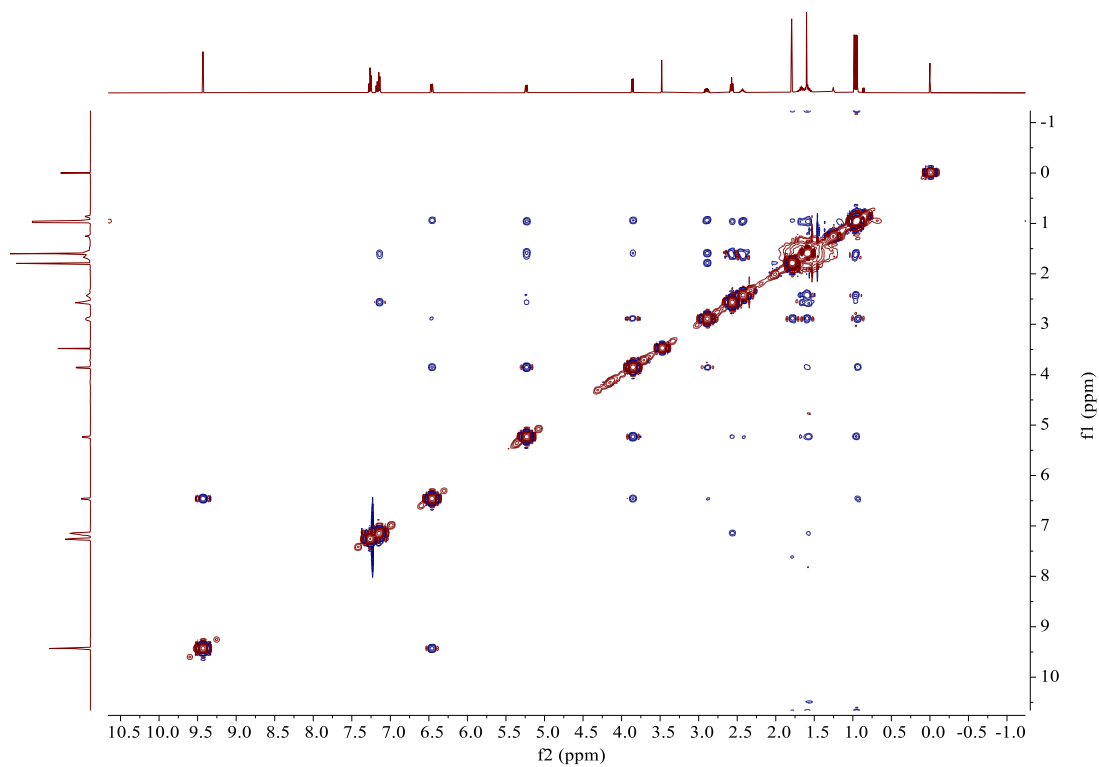

**Figure S8** NOESY spectrum of phenalamide D (**1**) in  $\text{CDCl}_3$ .

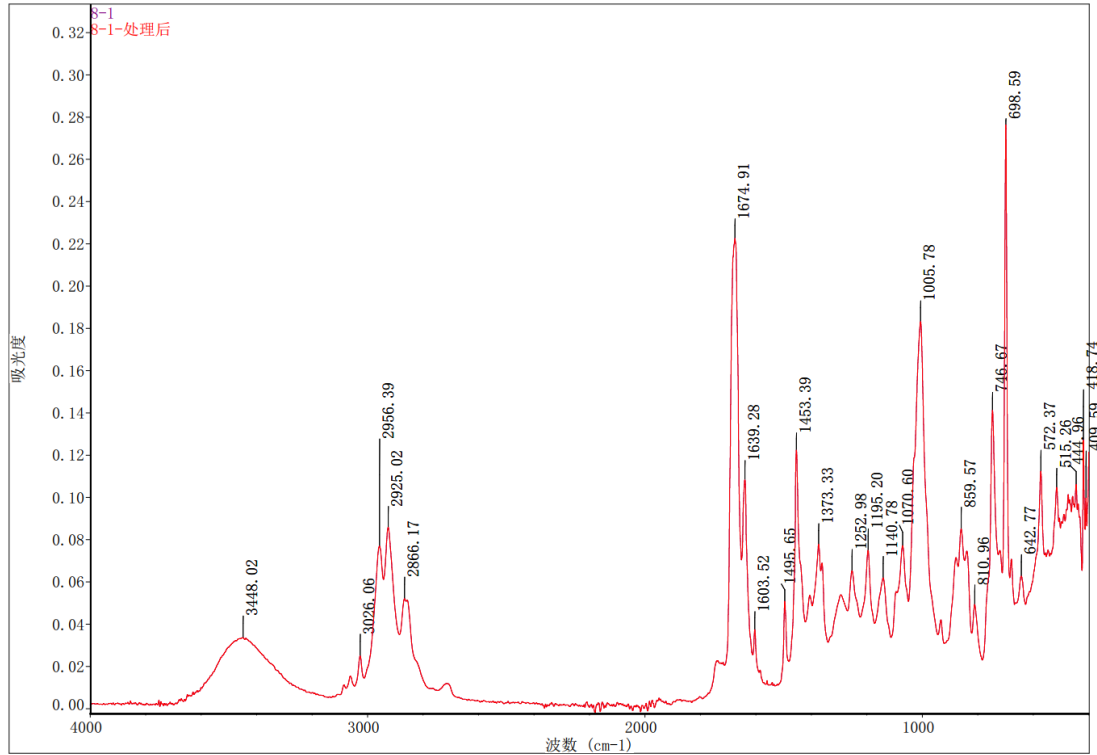

Figure S9 IR spectrum of phenalamide D (1).

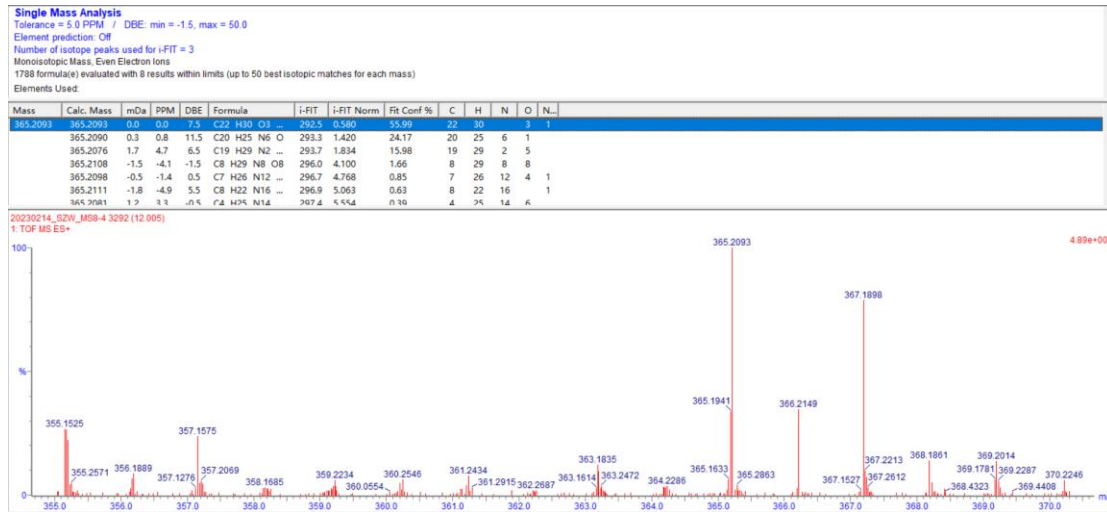

Figure S10 HRESI-MS spectrum of phenalamide E (2).

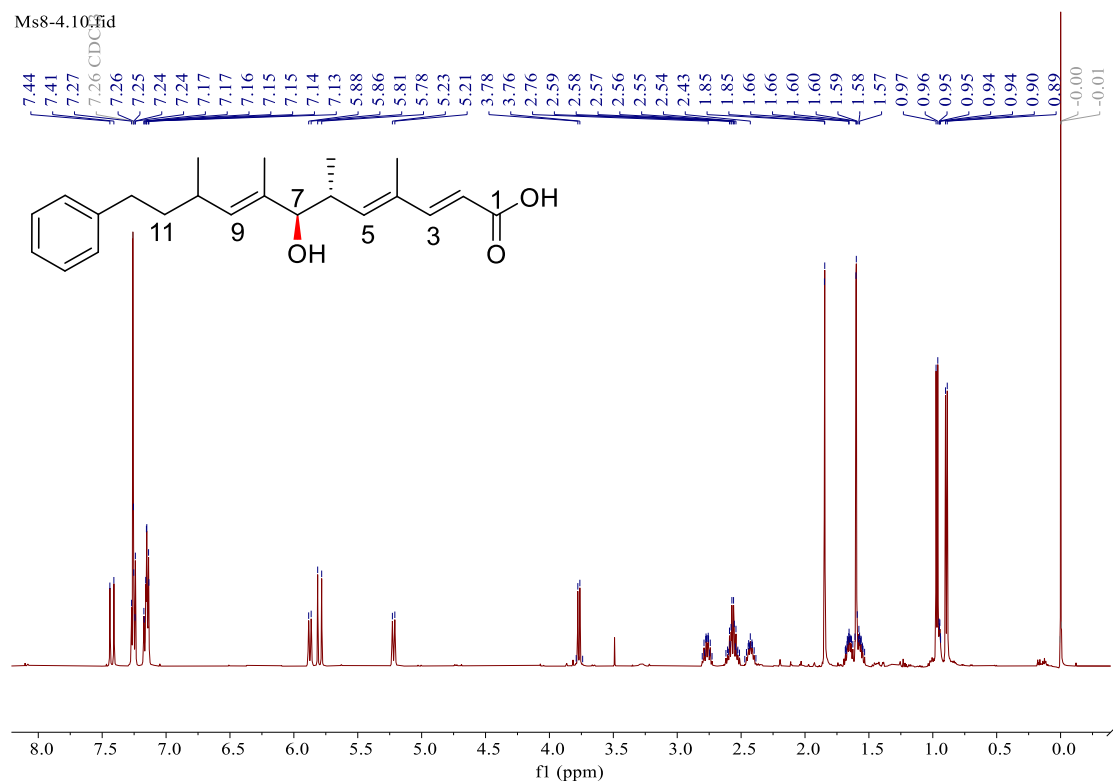

**Figure S11**  $^1\text{H}$  NMR spectrum of phenalamide E (**2**) in  $\text{CDCl}_3$  (500 MHz).

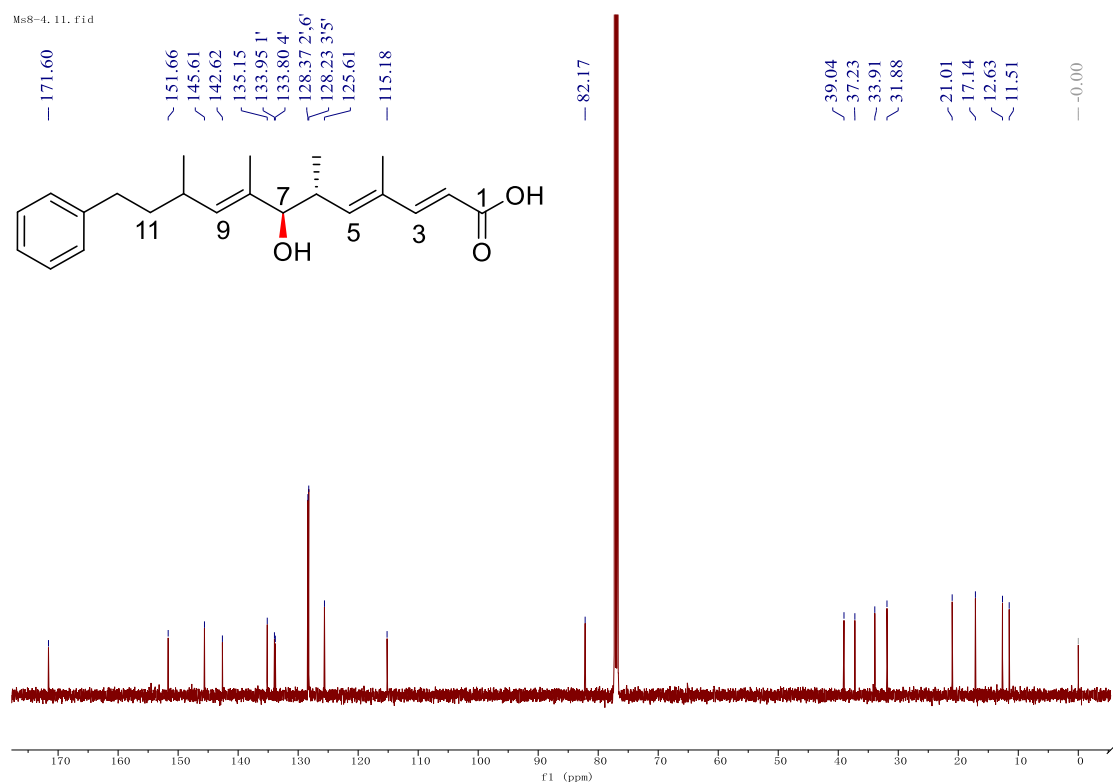

**Figure S12**  $^{13}\text{C}$  NMR spectrum of phenalamide E (**2**) in  $\text{CDCl}_3$  (125 MHz).

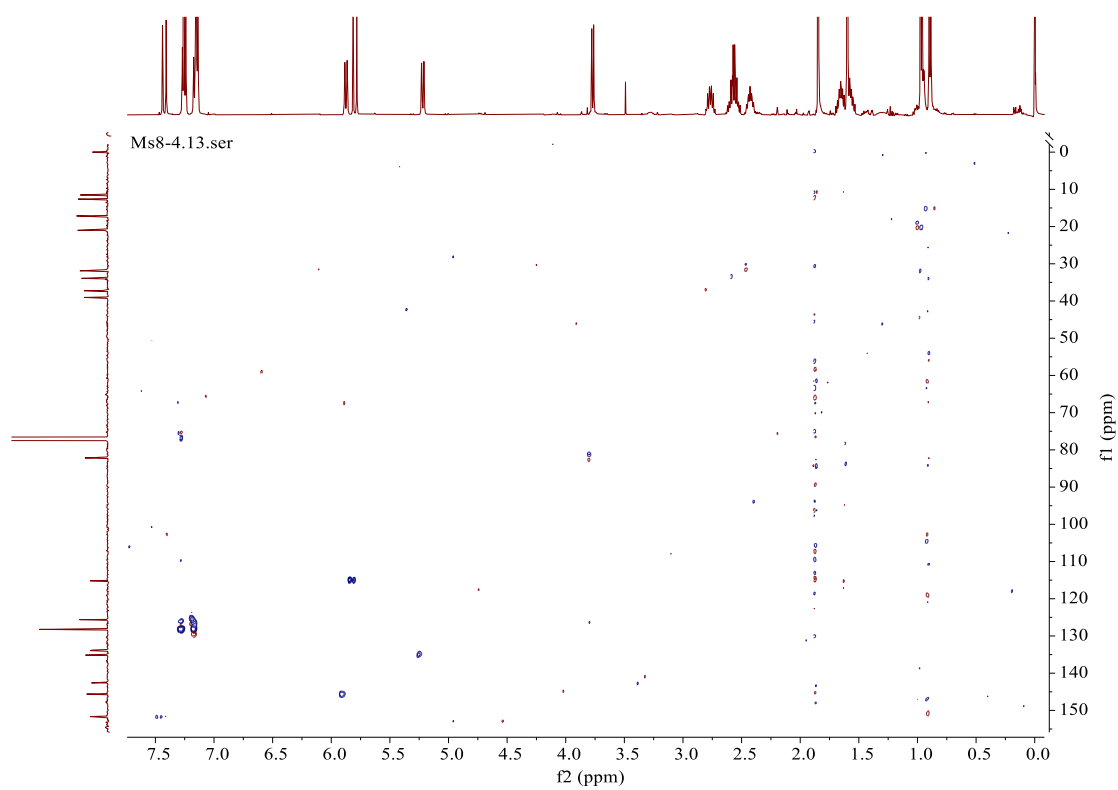

**Figure S13** HSQC spectrum of phenalamide E (**2**) in  $\text{CDCl}_3$ .

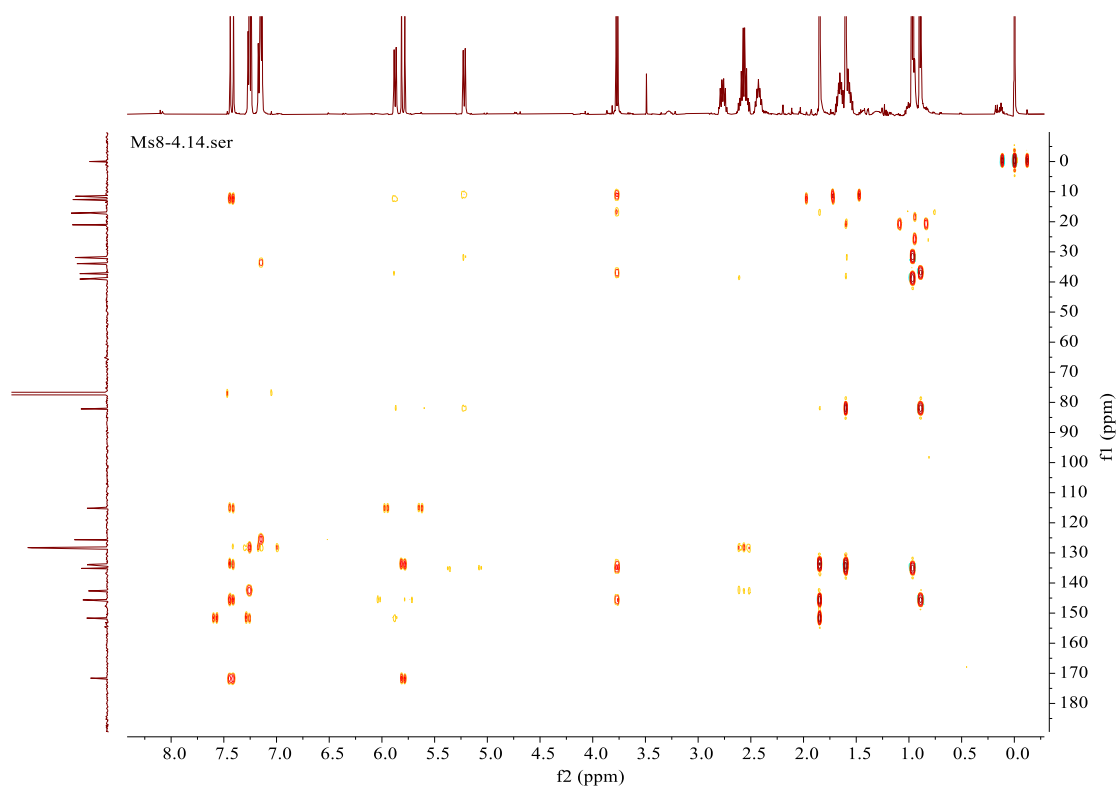

**Figure S14** HMBC spectrum of phenalamide E (**2**) in  $\text{CDCl}_3$ .

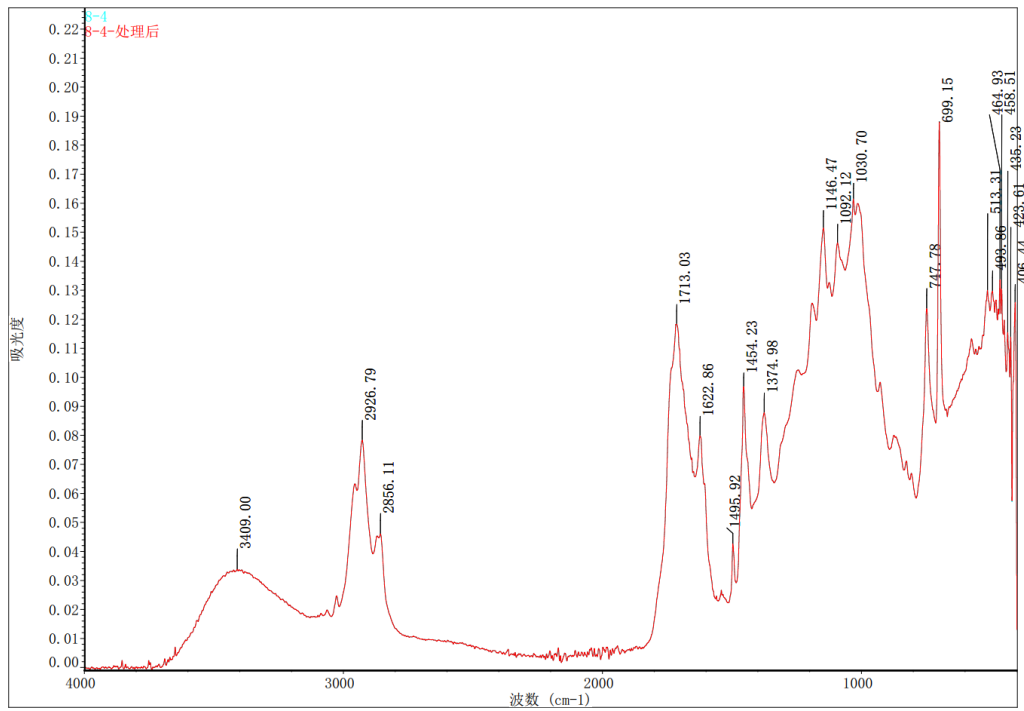

Figure S15 IR spectrum of phenalamide E (2).

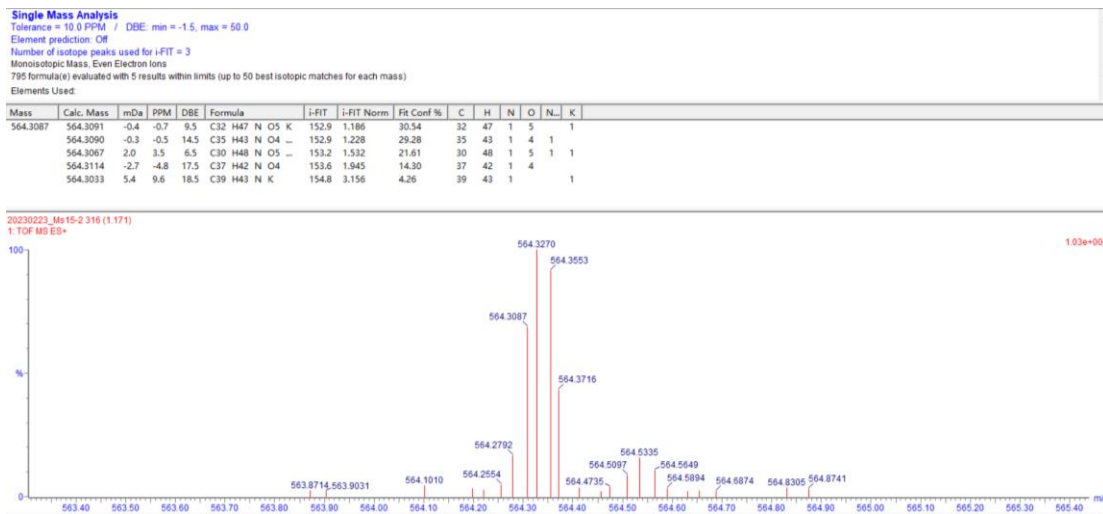

Figure S16 HRESI-MS spectrum of phenalamide F (3).

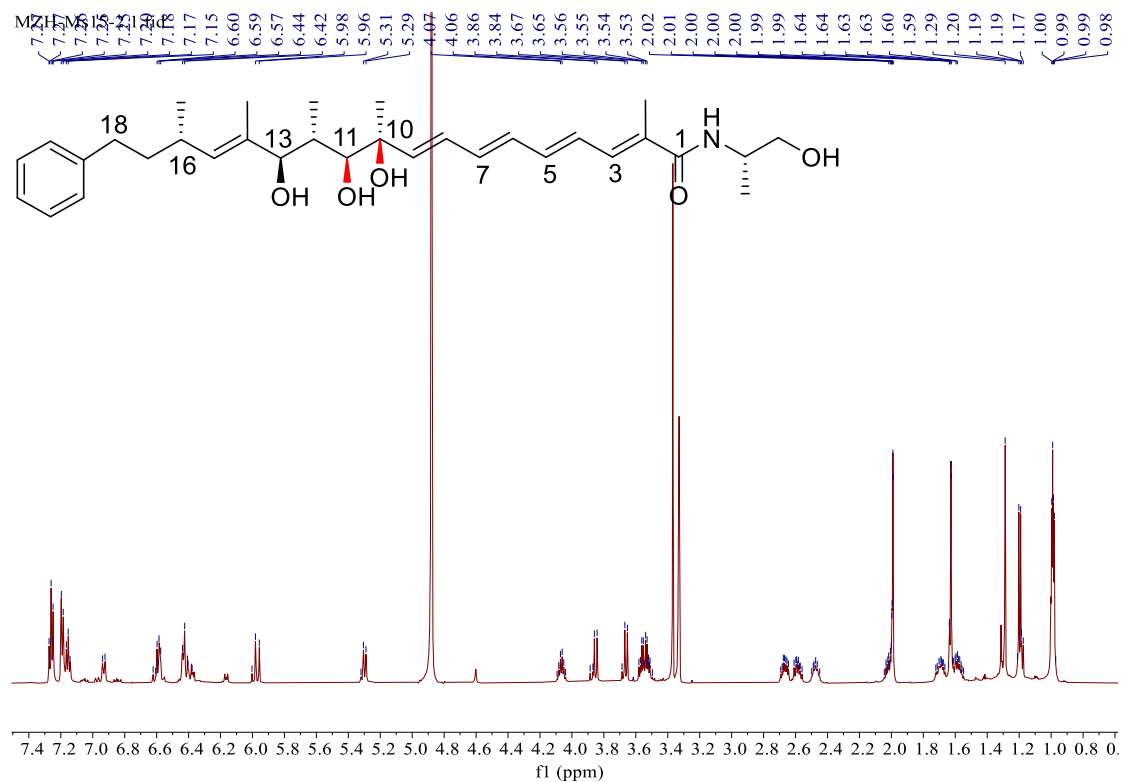

**Figure S17** <sup>1</sup>H NMR spectrum of phenalamide F (**3**) in CD<sub>3</sub>OD (600 MHz).

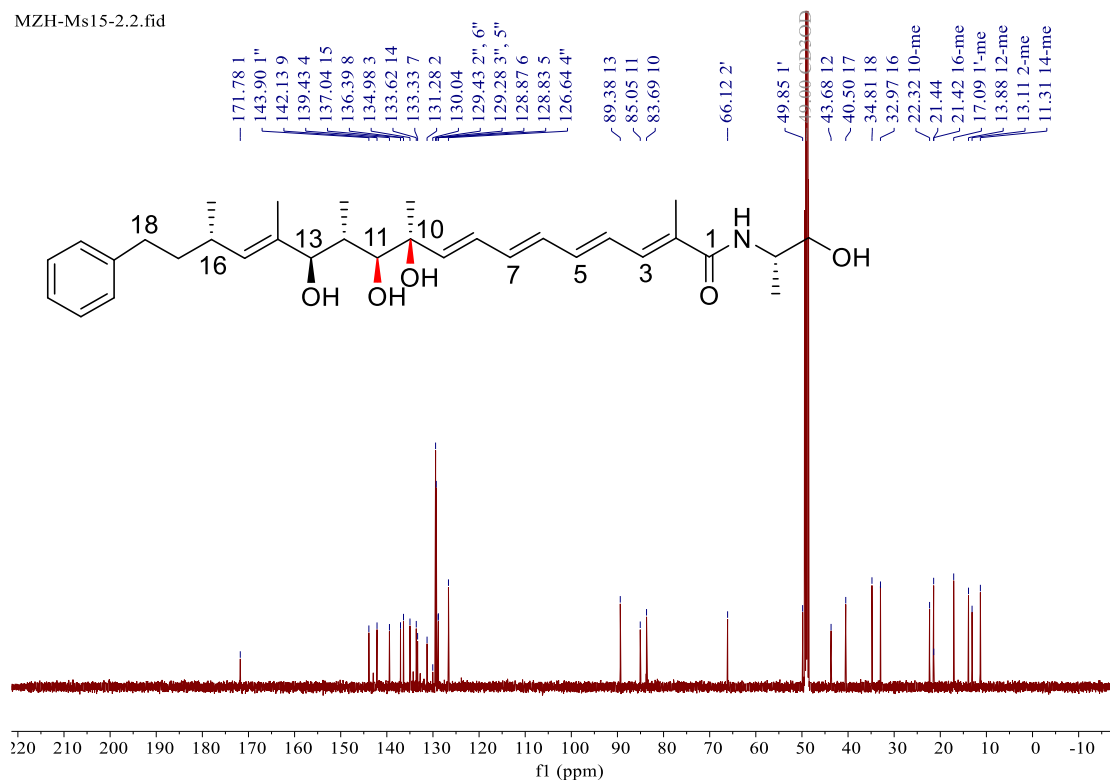

**Figure S18** <sup>13</sup>C NMR spectrum of phenalamide F (**3**) in CD<sub>3</sub>OD (150 MHz).

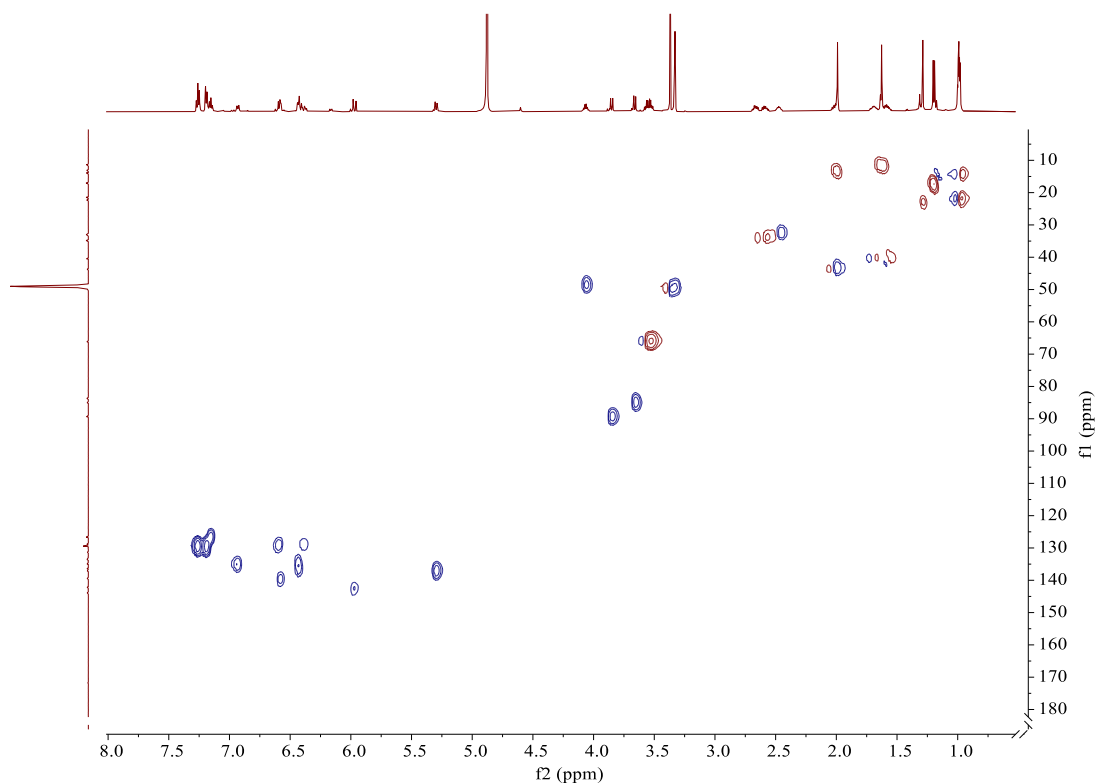

**Figure S19** HSQC spectrum of phenalamide F (**3**) in CD<sub>3</sub>OD.

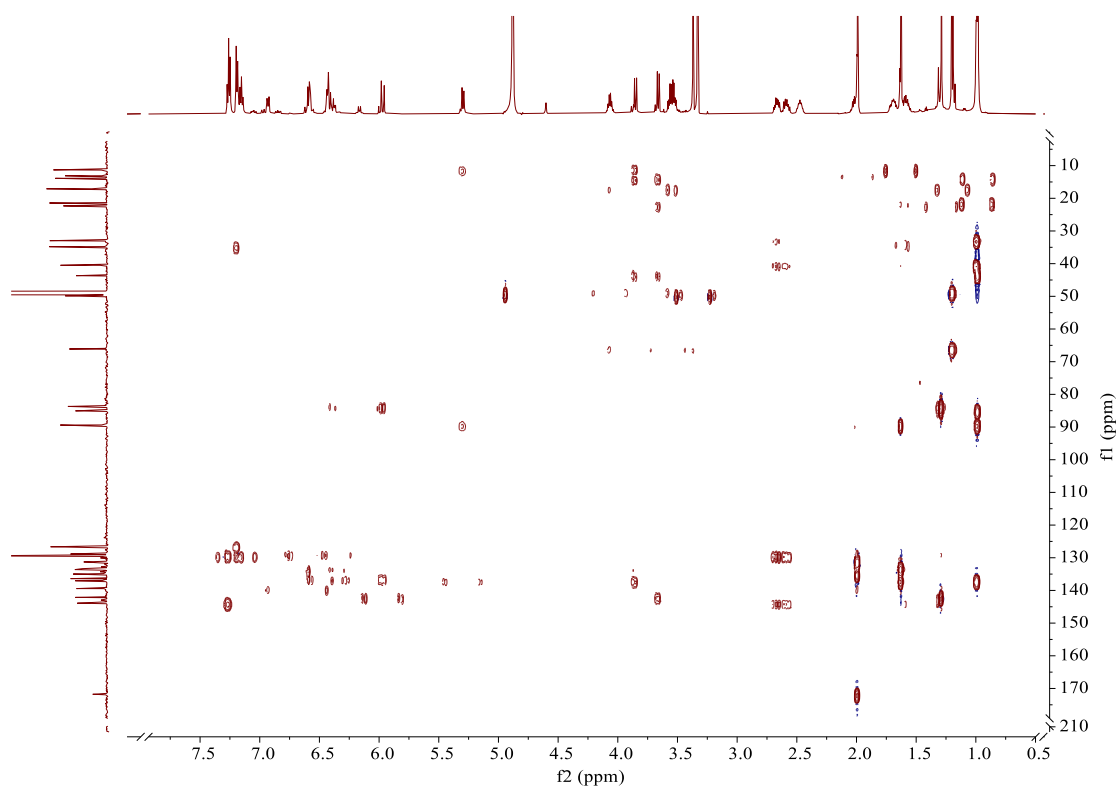

**Figure S20** HMBC spectrum of phenalamide F (**3**) in CD<sub>3</sub>OD.

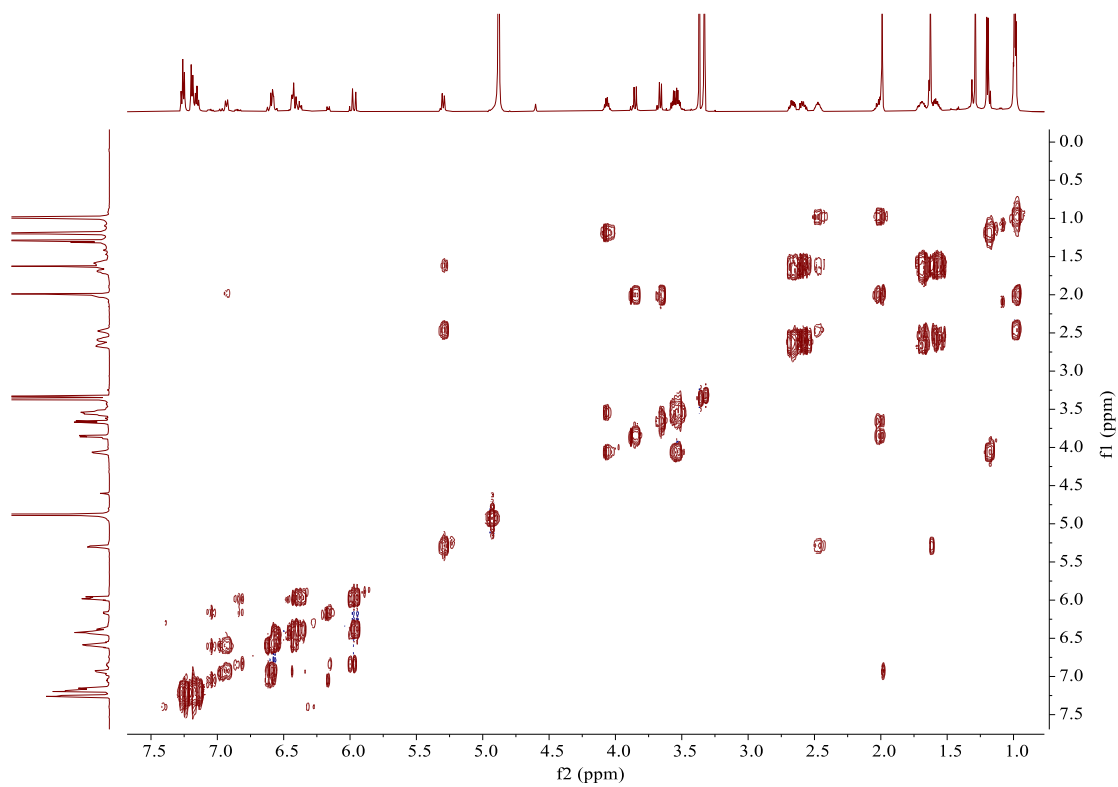

**Figure S21**  $^1\text{H}$ - $^1\text{H}$  COSY spectrum of phenalamide F (**3**) in  $\text{CD}_3\text{OD}$ .

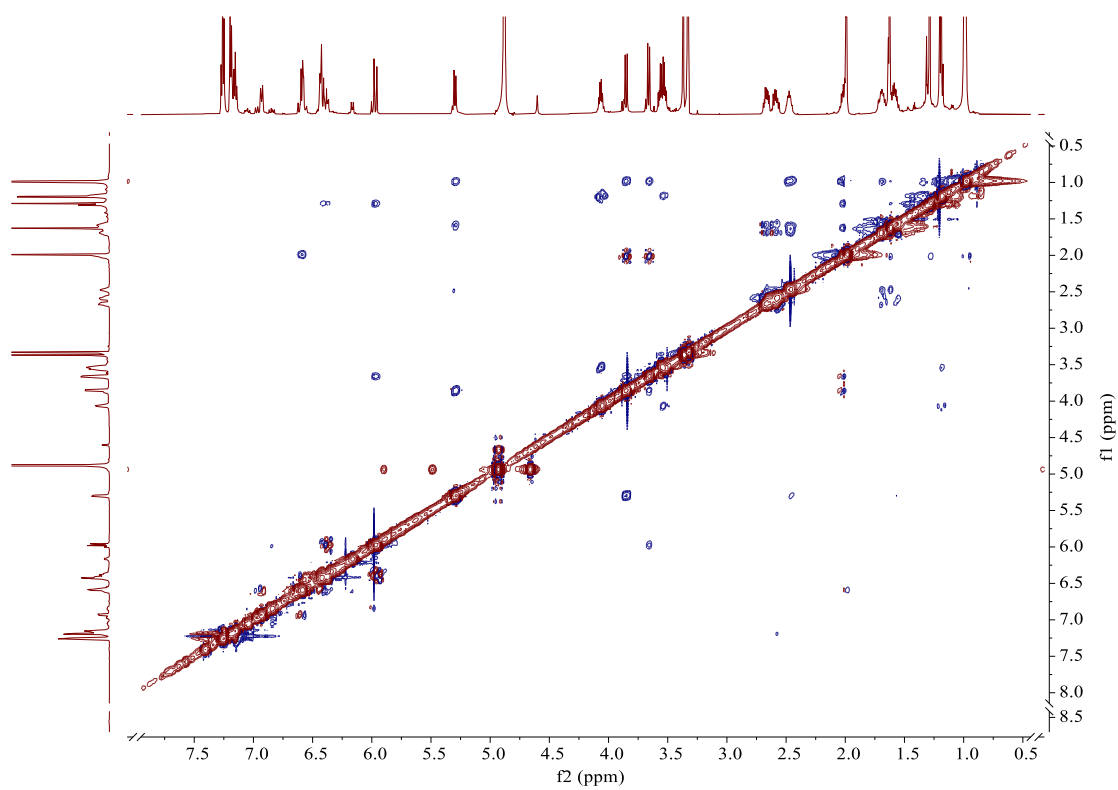

**Figure S22** NOESY spectrum of phenalamide F (**3**) in  $\text{CD}_3\text{OD}$ .

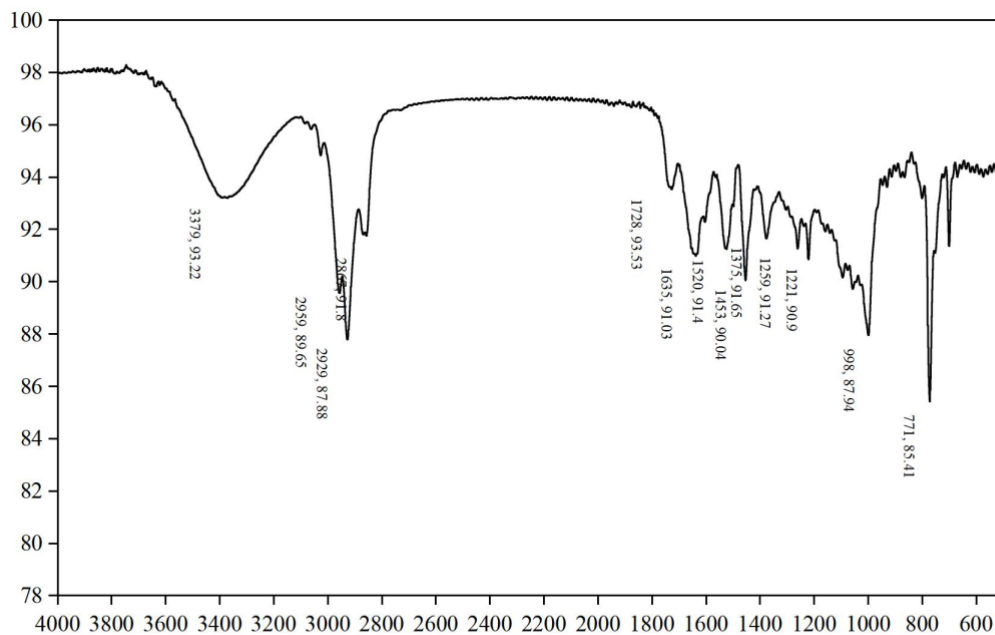

**Figure S23** IR spectrum of phenalamide F (3).

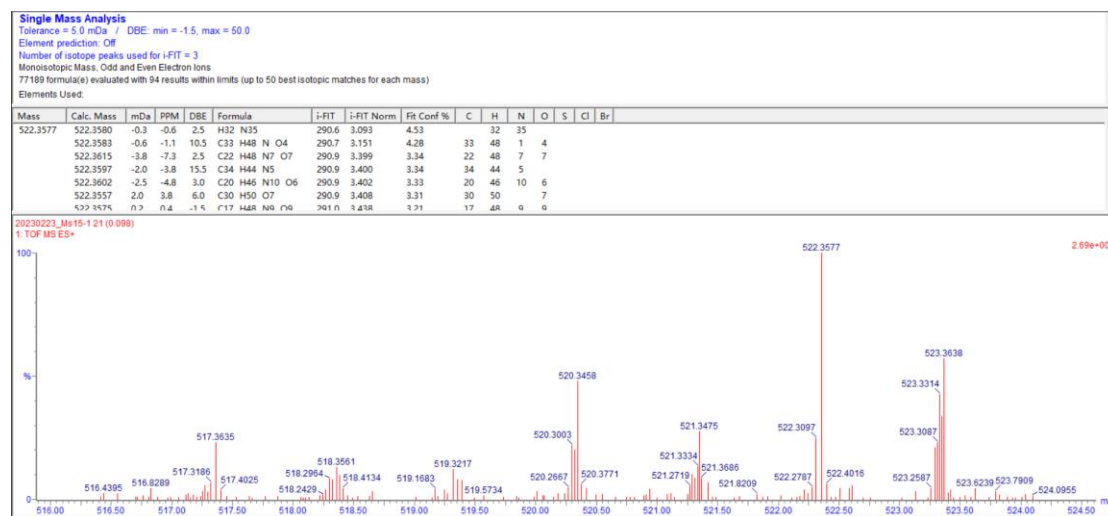

**Figure S24** HRESI-MS spectrum of phenalamide G (4).

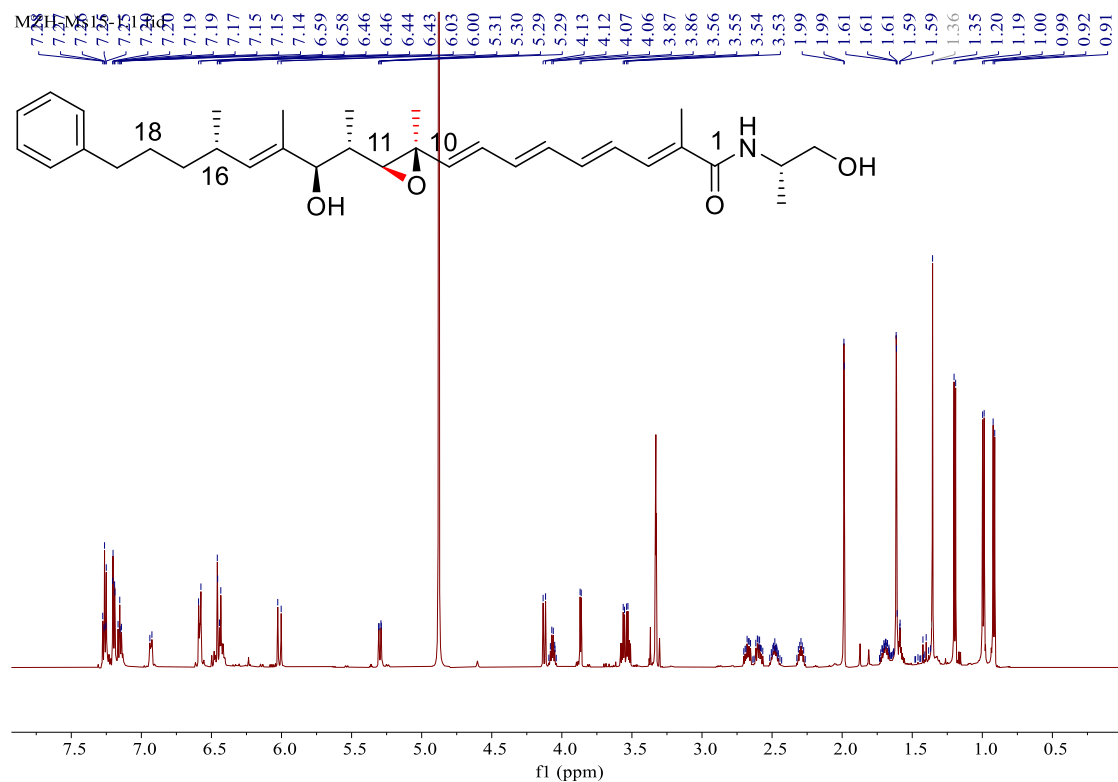

**Figure S25**  $^1\text{H}$  NMR spectrum of phenalamide G (**4**) in  $\text{CD}_3\text{OD}$  (600 MHz).

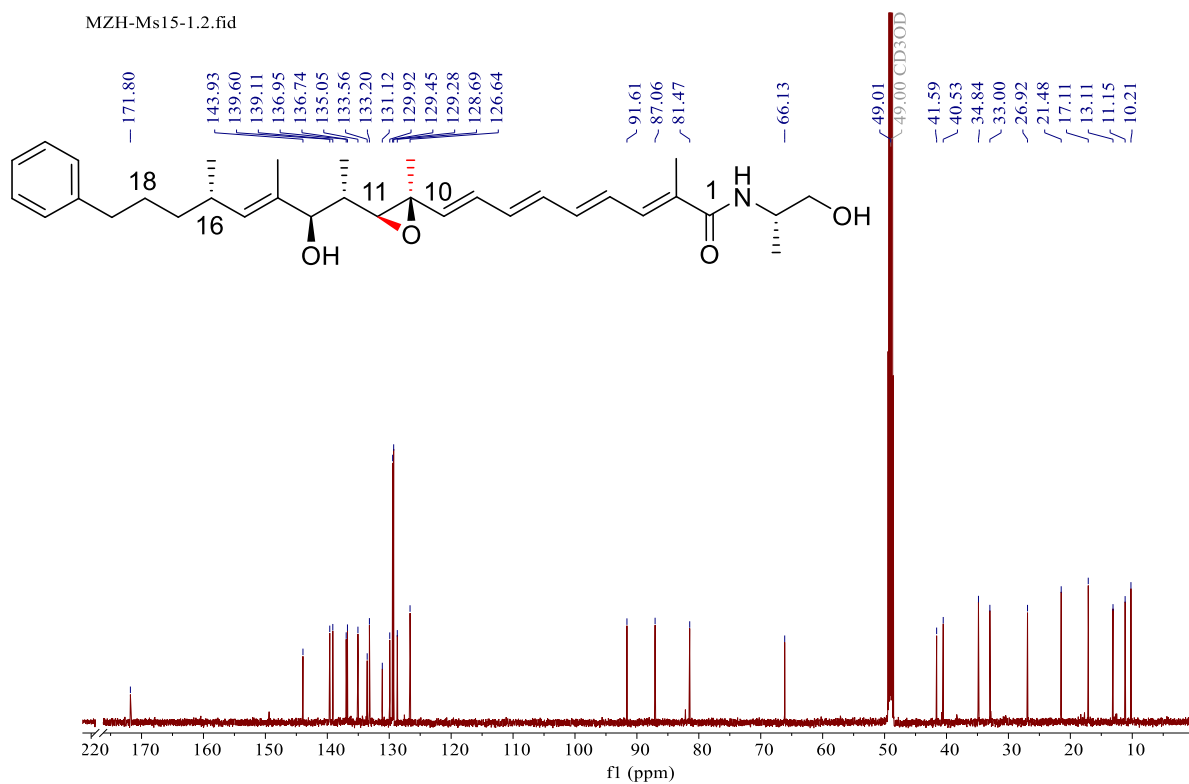

**Figure S26**  $^{13}\text{C}$  NMR spectrum of phenalamide G (**4**) in  $\text{CD}_3\text{OD}$  (150 MHz).

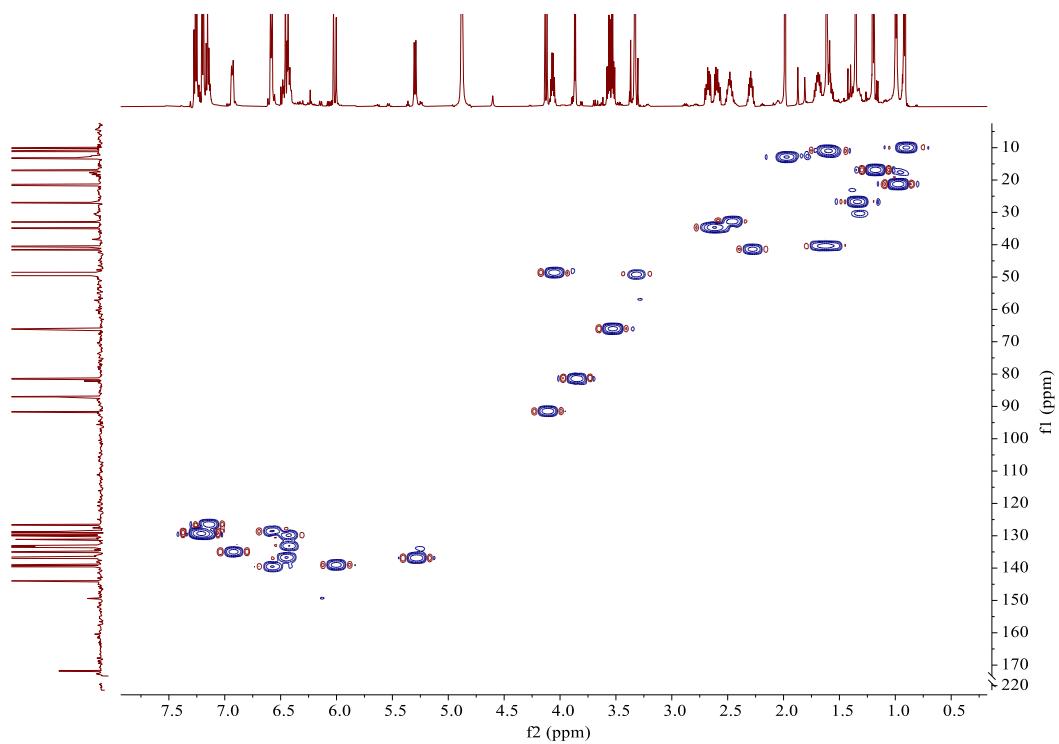

**Figure S27** HSQC spectrum of phenalamide G (**4**) in CD<sub>3</sub>OD.

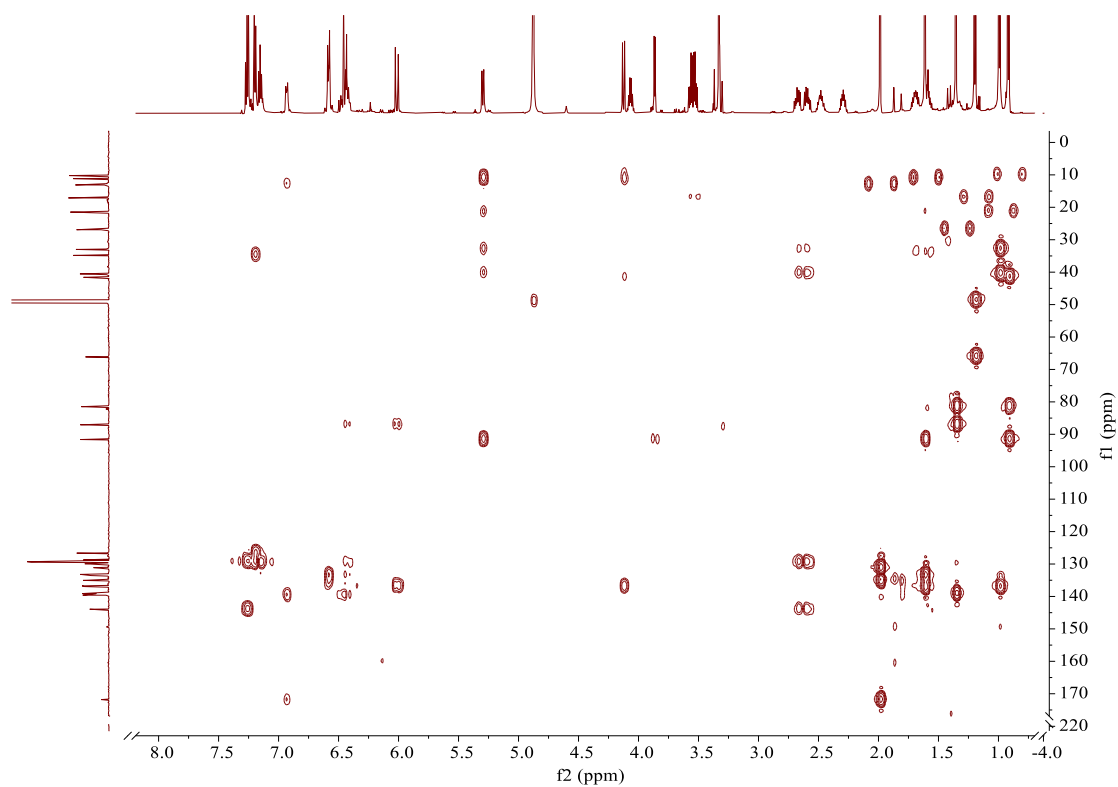

**Figure S28** HMBC spectrum of phenalamide G (**4**) in CD<sub>3</sub>OD.

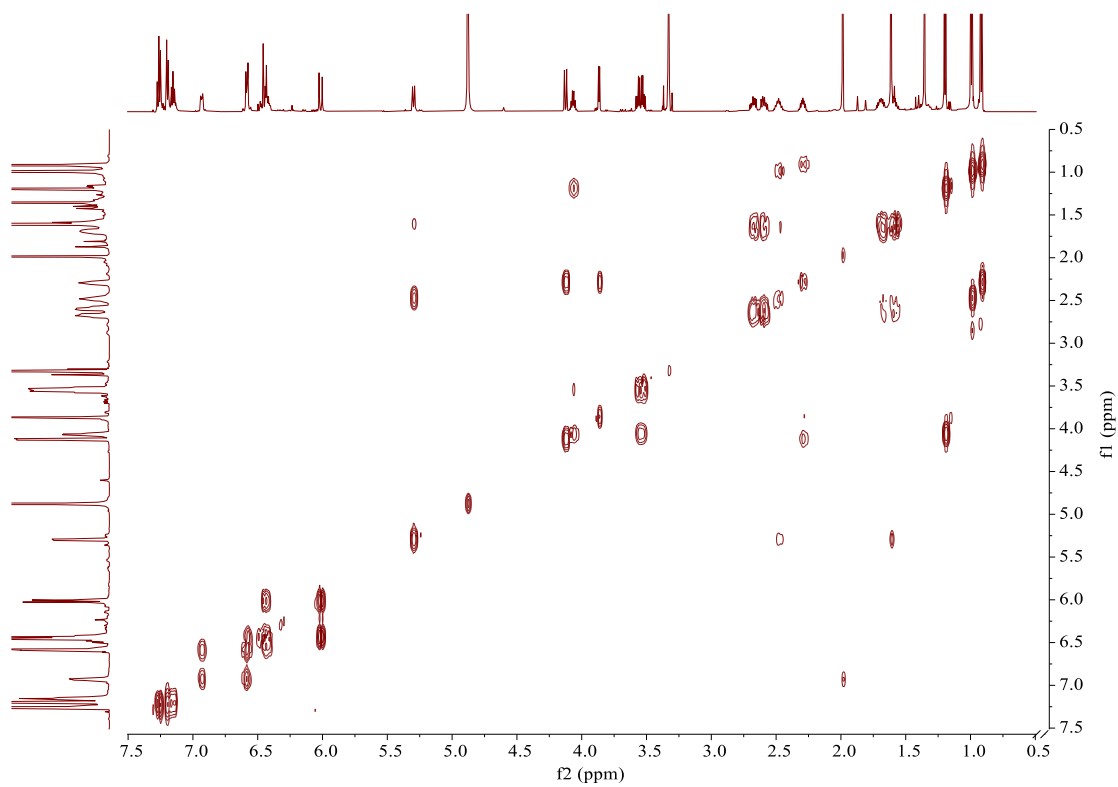

**Figure S29**  $^1\text{H}$ - $^1\text{H}$  COSY spectrum of phenalamide G (4) in  $\text{CD}_3\text{OD}$ .

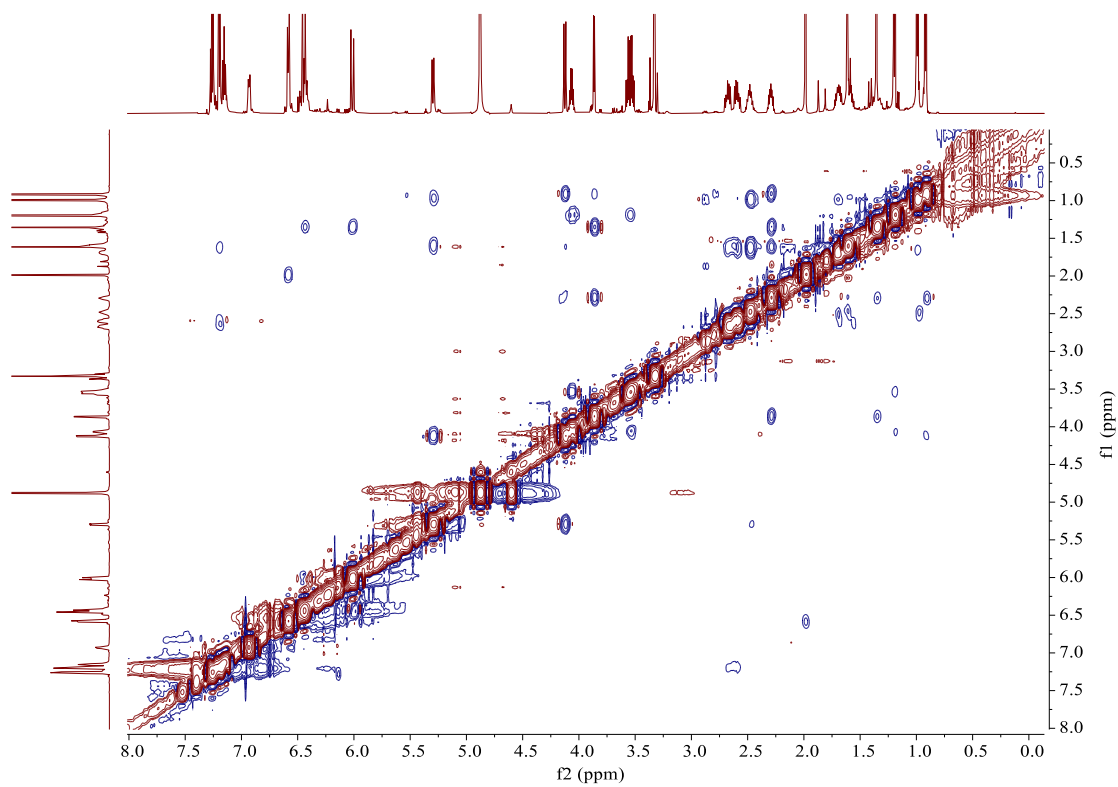

**Figure S30** NOESY spectrum of phenalamide G (4) in  $\text{CD}_3\text{OD}$ .

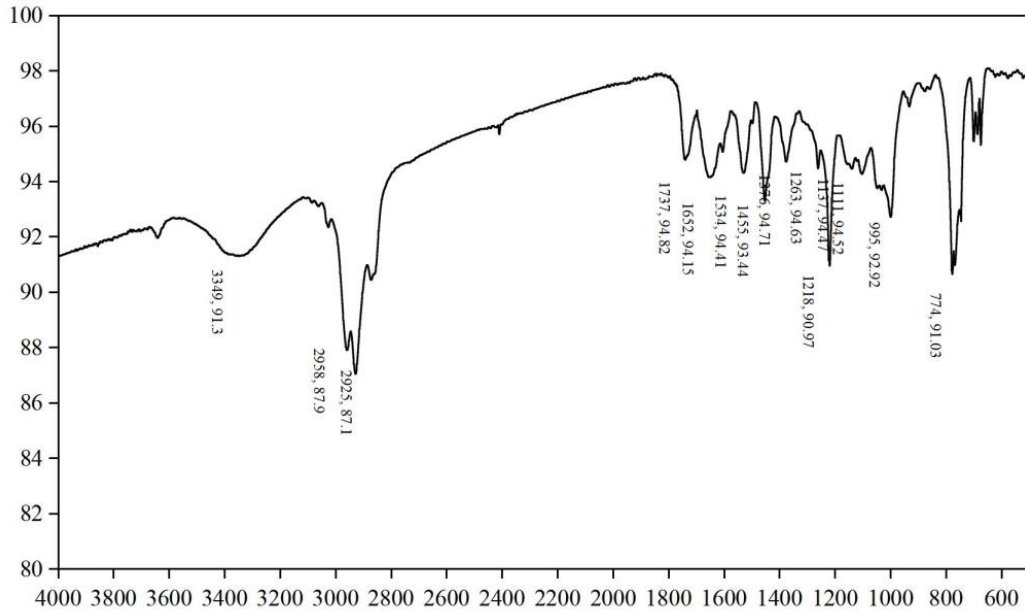

Figure S31 IR spectrum of phenalamide G (4).

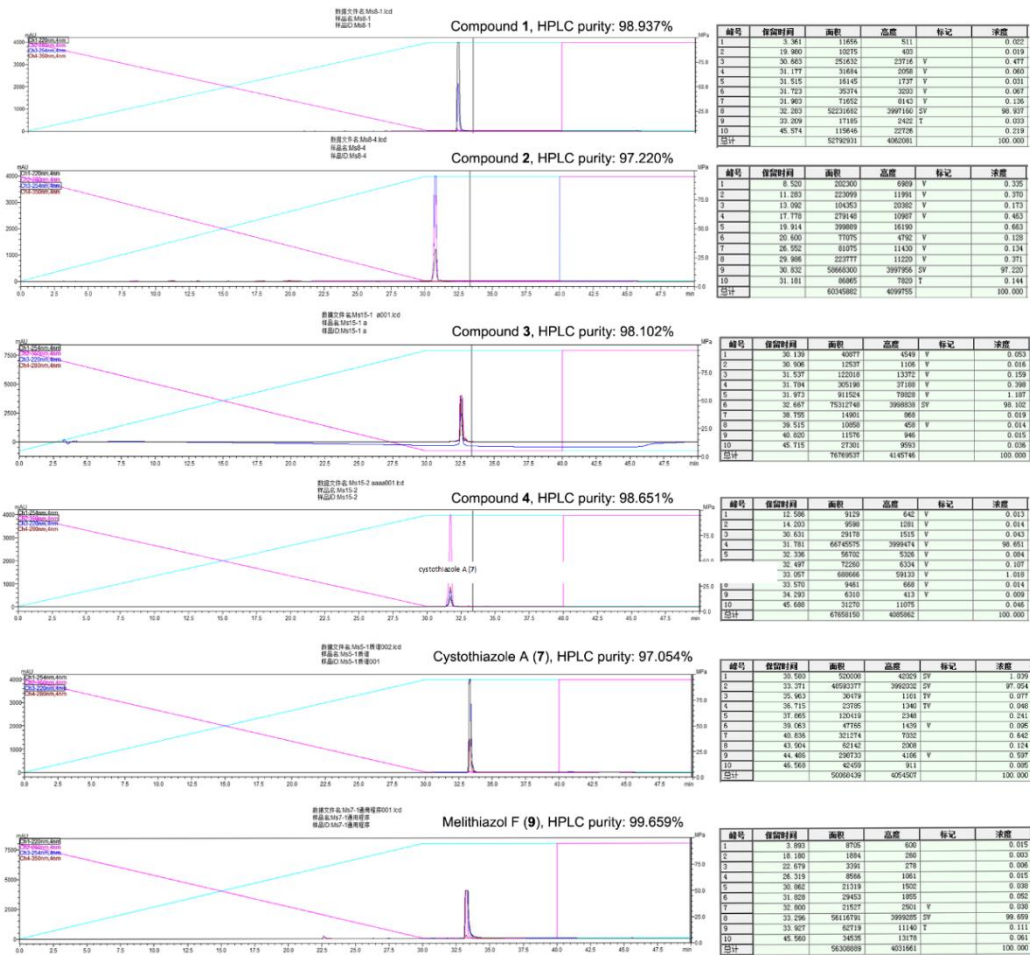

Figure S32. HPLC purity chromatograms of the isolated new compounds and potent active.
